# Supplementary material
Source: Springer Nature journal article supplement (https://www.springermedizin.de/resource/supplementary/13054_2012_668_MOESM1_ESM.pdf/9708958)
Supplement: MOESM1 [file 9708958]

1. Cardiopulmonary Resuscitation/
2. exp Resuscitation/
3. cardio\*.mp.
4. 2 and 3
5. 1 or 4
6. exp "Wounds and Injuries"/
7. 5 and 6
8. cardiopulmonary arrest.mp.
9. pulseless\*.mp.
10. 8 or 9
11. exp Heart Arrest/
12. heart arrest.mp.
13. 11 or 12
14. Asystole/
15. asystole\*.mp.
16. 14 or 15
17. 13 or 16
18. trauma\*.mp.
19. 17 and 18
20. 7 or 19
21. out of hospital\*.mp.
22. out-of-hospital\*.mp.
23. pre hospital\*.mp.
24. pre-hospital\*.mp.
25. 21 or 22 or 23 or 24
26. Emergency Medical Services/
27. Emergency Treatment/
28. First Aid/
29. exp "Transportation of Patients"/
30. 26 or 27 or 28 or 29
31. 25 or 30
32. 20 and 31
